# Supplementary material
Source: PubMed Central journal article supplement (PMC10125385)
Supplement: ng2c00035_si_001.pdf [file ng2c00035_si_001.pdf]

**Importance of metal biotransformation in cell response to metallic nanoparticles: a transcriptomic meta-analysis study**

*Alice Balfourier<sup>†,‡</sup>, Anne-Pia Marty<sup>†</sup>, Florence Gazeau<sup>†,\*</sup>*

<sup>†</sup> Université Paris Cité, Laboratoire Matière et Systèmes Complexes (MSC), CNRS, 45 rue des Saints Pères, 75006 Paris, France

<sup>‡</sup> Current address: Laboratoire de BioMolécules (LBM), Département de Chimie, École Normale Supérieure, PSL University, Sorbonne Université, CNRS, 24 rue Lhomond, 75005, Paris, France

\* Corresponding author: [florence.gazeau@u-paris.fr](mailto:florence.gazeau@u-paris.fr)

## Supplementary Information

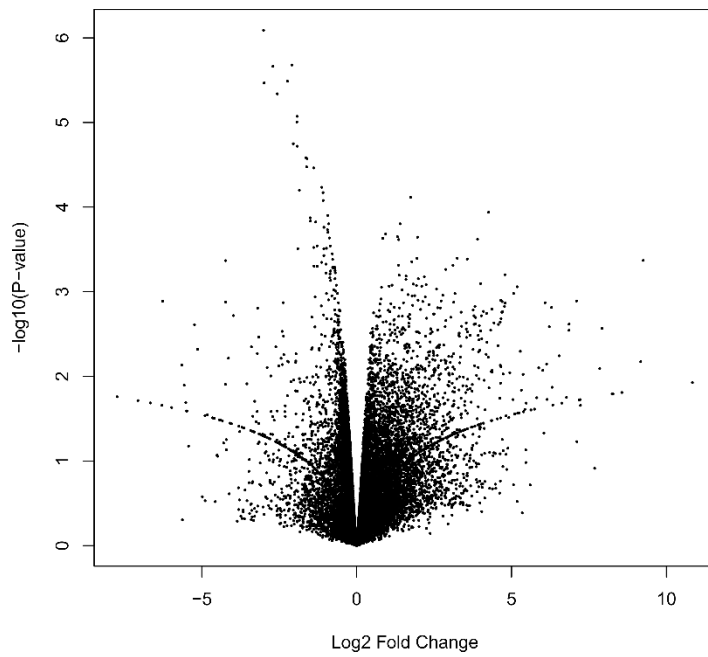

**Fig. S1.** Example of a volcano plot that does not match quality standard because of unexpected alignment between points. The corresponding original data set was excluded from the analysis.

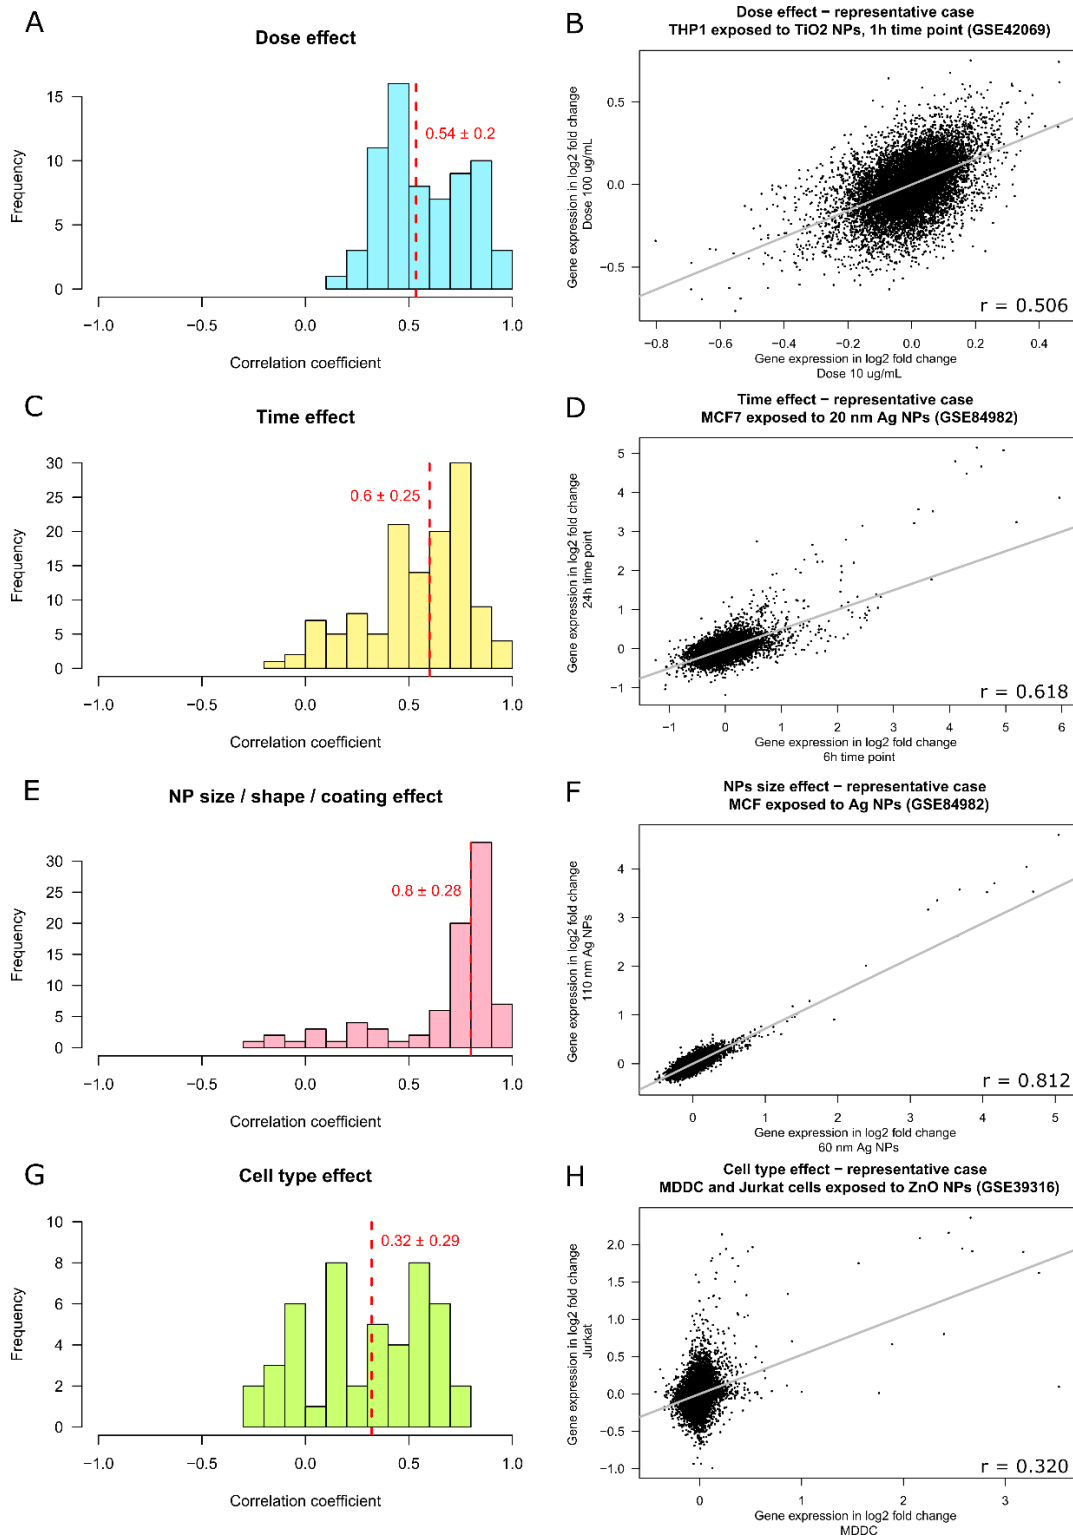

**Fig. S2.** Distribution of correlation coefficients between  $\log_2$  fold change gene expression calculated between the different experimental parameters tested in each dataset (A, C, E, G), and representative examples of these correlation coefficients (B, D, F, H). Experimental parameters displayed are dose (A,B), time (C,D), NP size, shape or coating (E, F) and cell type (G, H). Red dotted lines and numbers indicate the median of the distribution and the standard deviation.

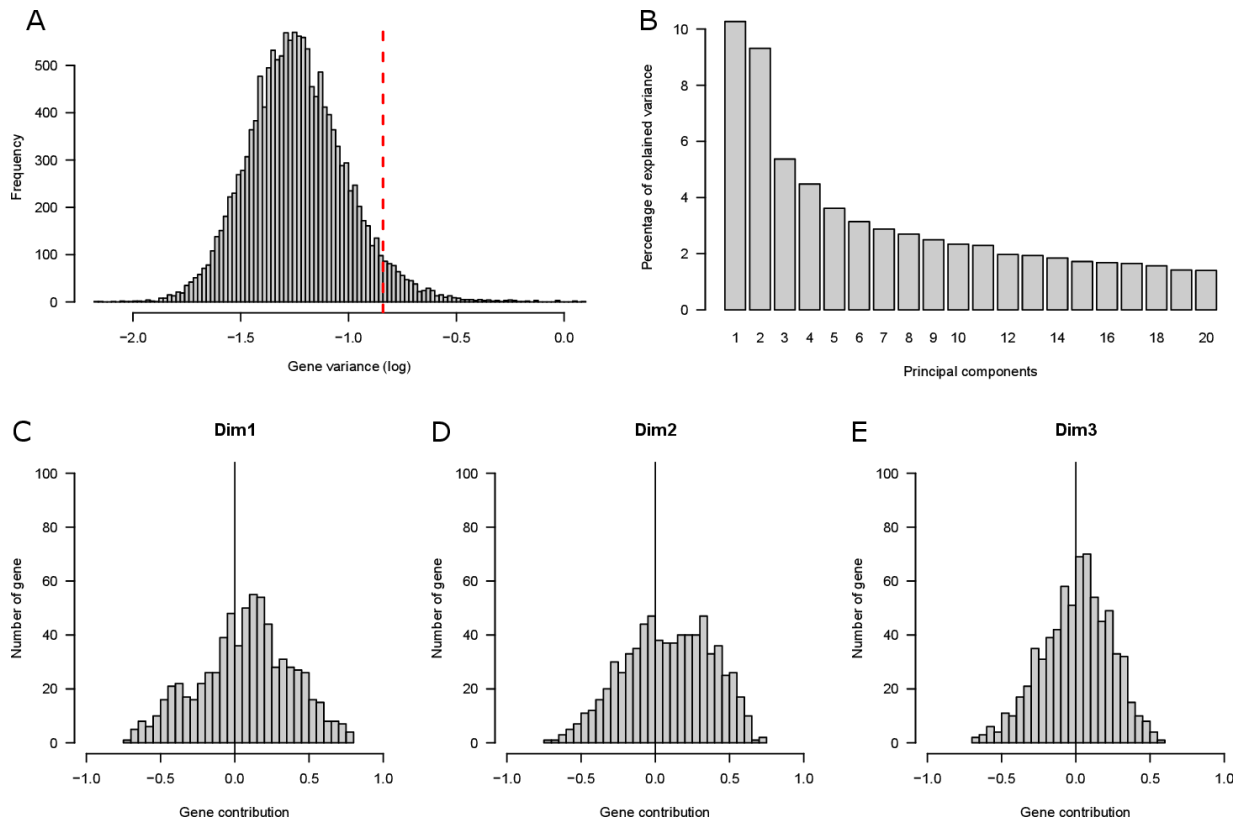

**Fig. S3.** Principal Component Analysis (PCA) associated graphs and quality controls. (A) Histogram of the variance in logarithmic value for all considered genes. The red dotted line indicates the threshold above which the genes were selected as input for the PCA. (B) Percentage of explained variance for the 20 principal components of the PCA. (C, D, E) Histogram of the gene contribution to the three first principal components of the PCA.

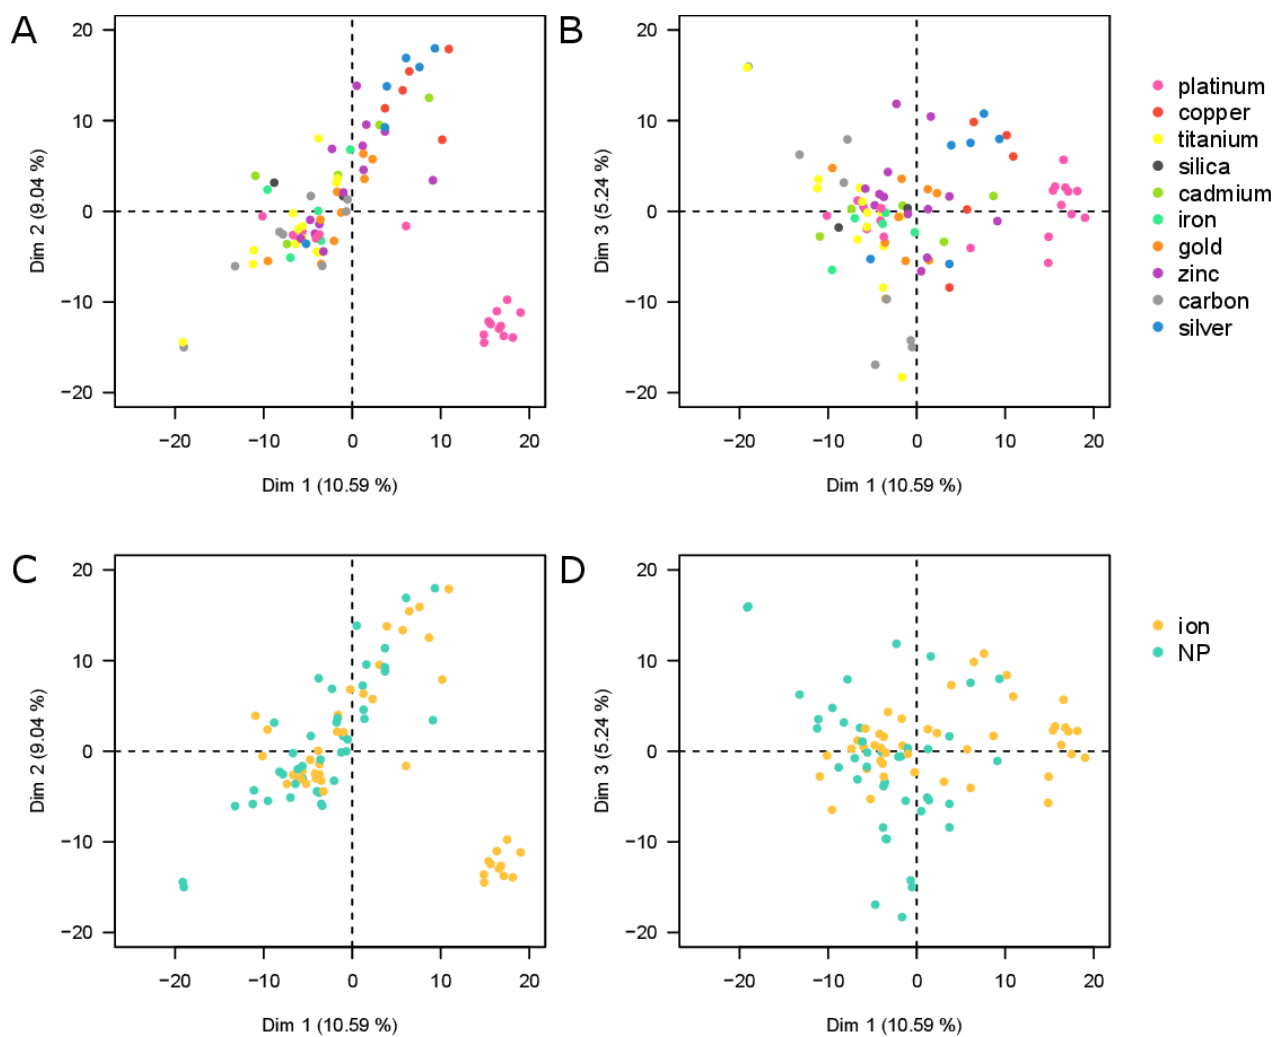

**Fig. S4.** Principal component analysis performed on the 85 studied conditions and the genes with the highest variance. Representation of the two first principal components (A and C) or the first and third component (B and D) with visualization of the metal type (A and B) or the formulation of the metal (C and D).

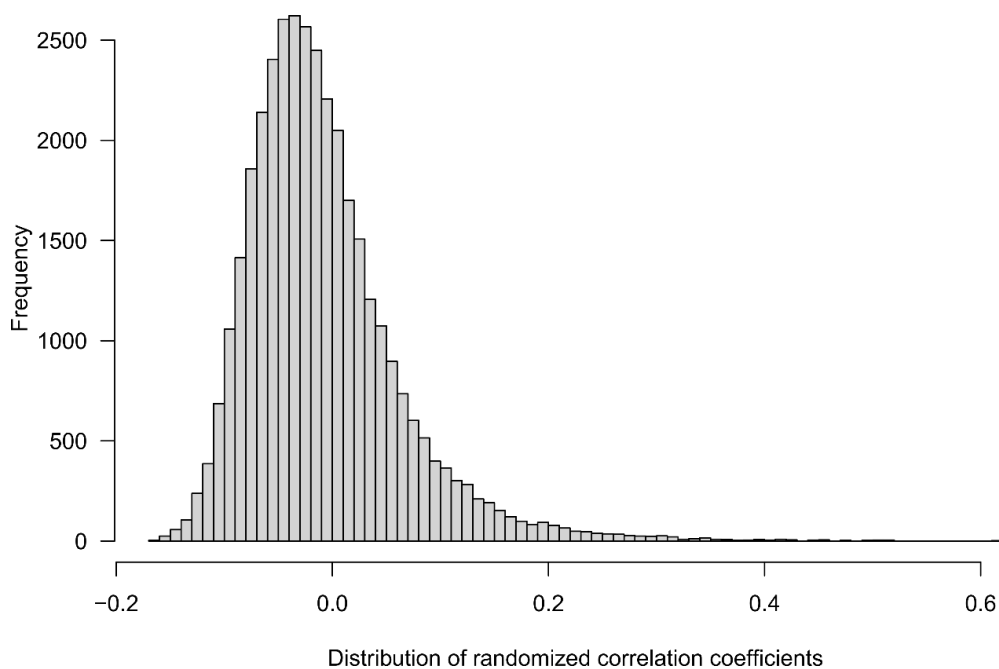

**Fig. S5.** Distribution of weighted correlation coefficients from randomized data of Figure 2. All combination of vectors are here equally represented.

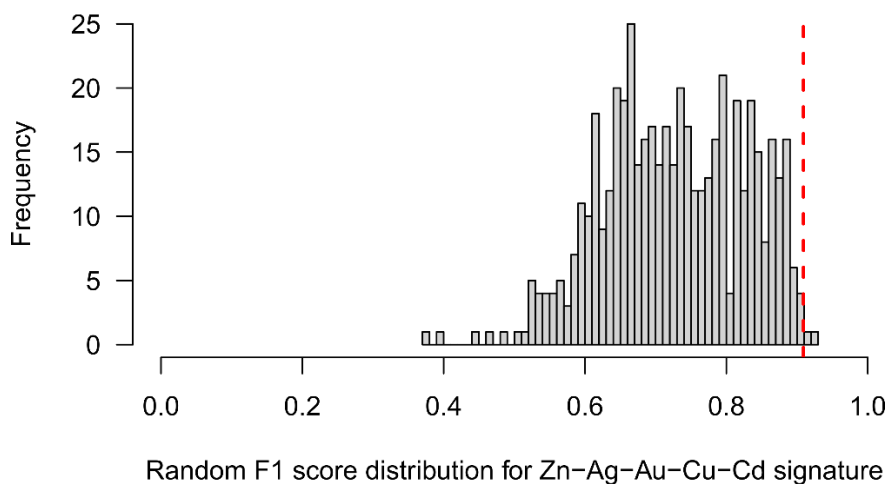

**Fig. S6.** Distribution of  $F_1$  scores obtained for random set of genes from the 50 top genes corresponding to Zn, Ag, Au, Cu and Cd signature. The number of randomly selected gene is chosen according to the size of the optimized selection. Red dotted lines indicate the optimized  $F_1$  score obtained, which is here 0.9090. The calculated p-value is 0.0040.

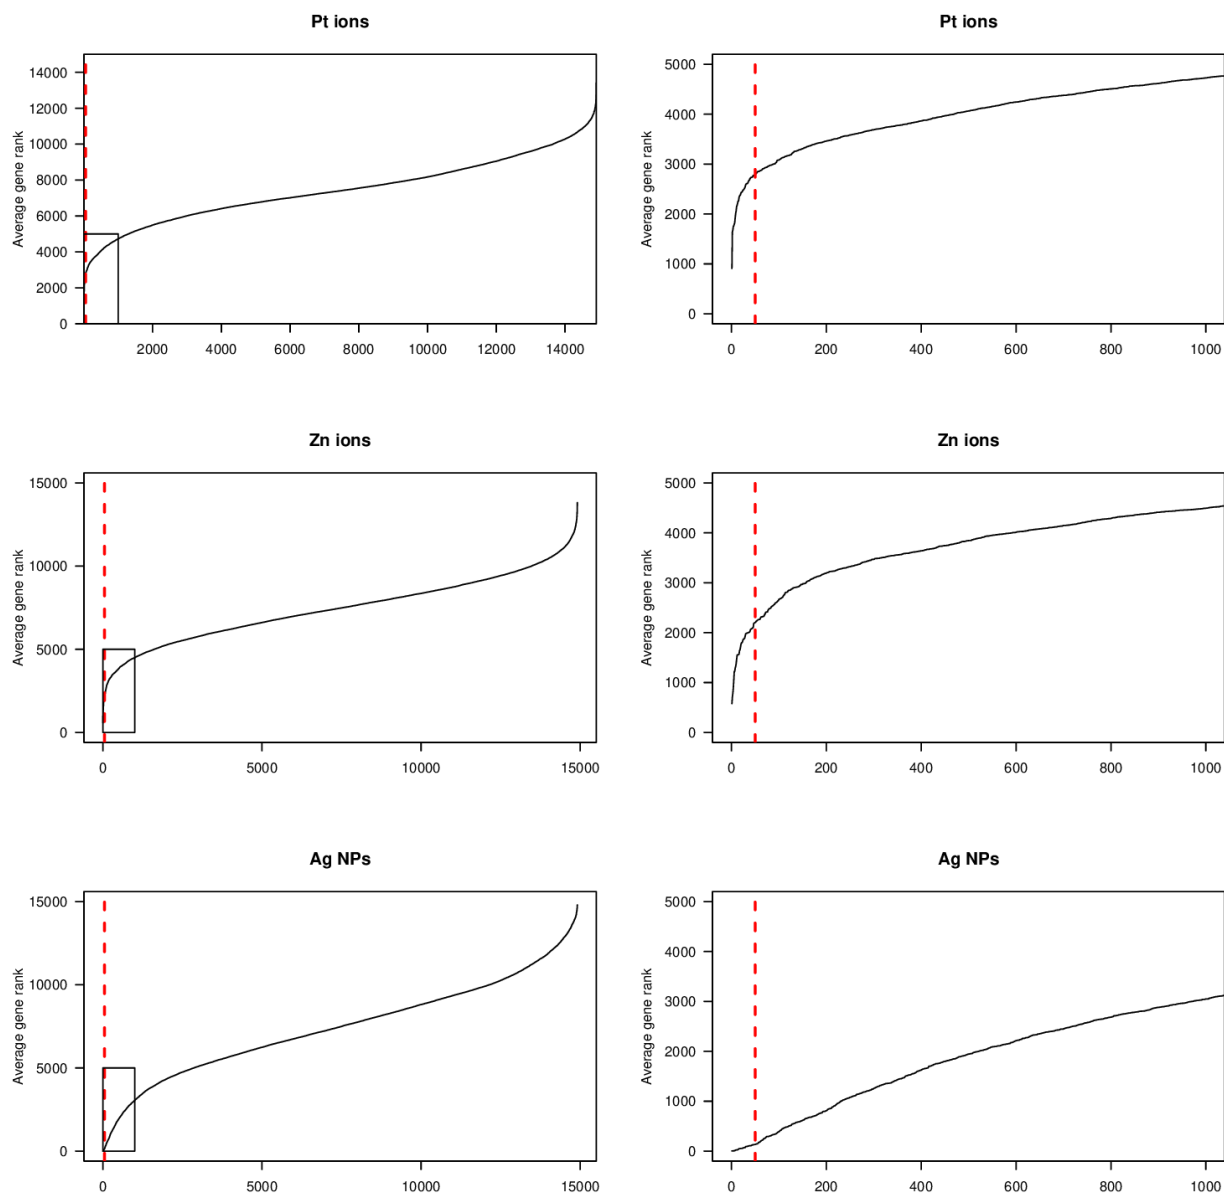

**Fig. S7.** Representative average rank plots for three materials/ionic forms that average 19 conditions (Pt ions), 7 conditions (Zn ions) and 3 conditions (Ag NPs). The dark square areas are highlighted by the graphics on the right side. The red dotted line delineates the fifty first genes that have been selected for further study.

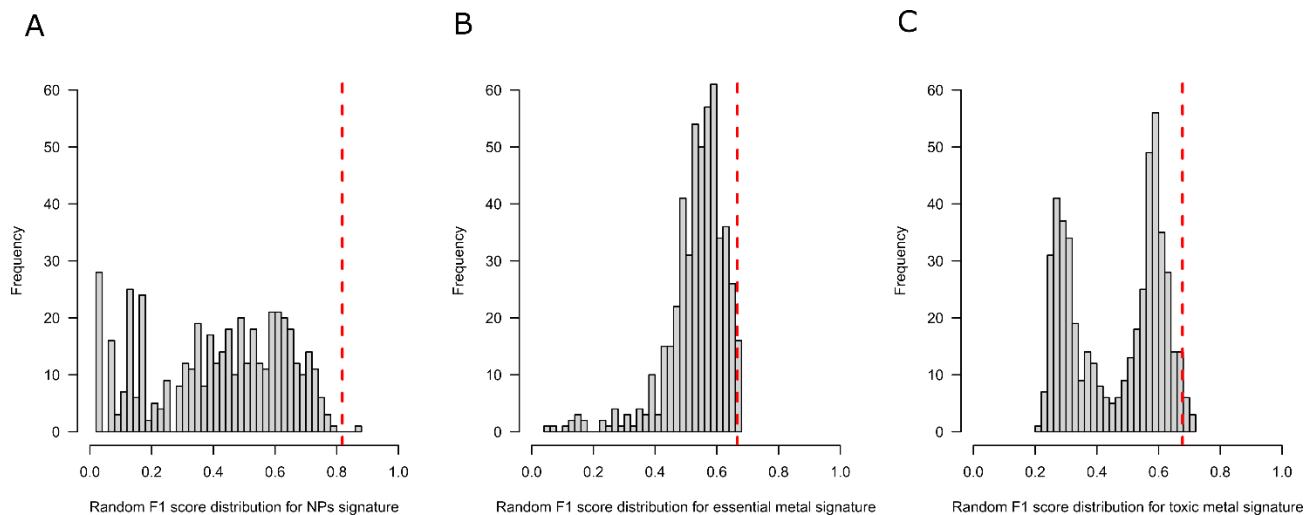

**Fig. S8.** Distribution of  $F_1$  scores obtained for random set of genes of the same size of the optimized selection. (A)  $F_1$  score distribution obtained from the 50 top genes corresponding to persistent nanoparticles. (B)  $F_1$  score distribution obtained from the 50 top genes corresponding to essentials metals. (C)  $F_1$  score distribution obtained from the 50 top genes corresponding to highly toxic metals. Red dotted lines indicate the optimized  $F_1$  score obtained in each case. Calculated p-values are respectively of 0.0021 (A), 0.020 (B) and 0.022 (C).



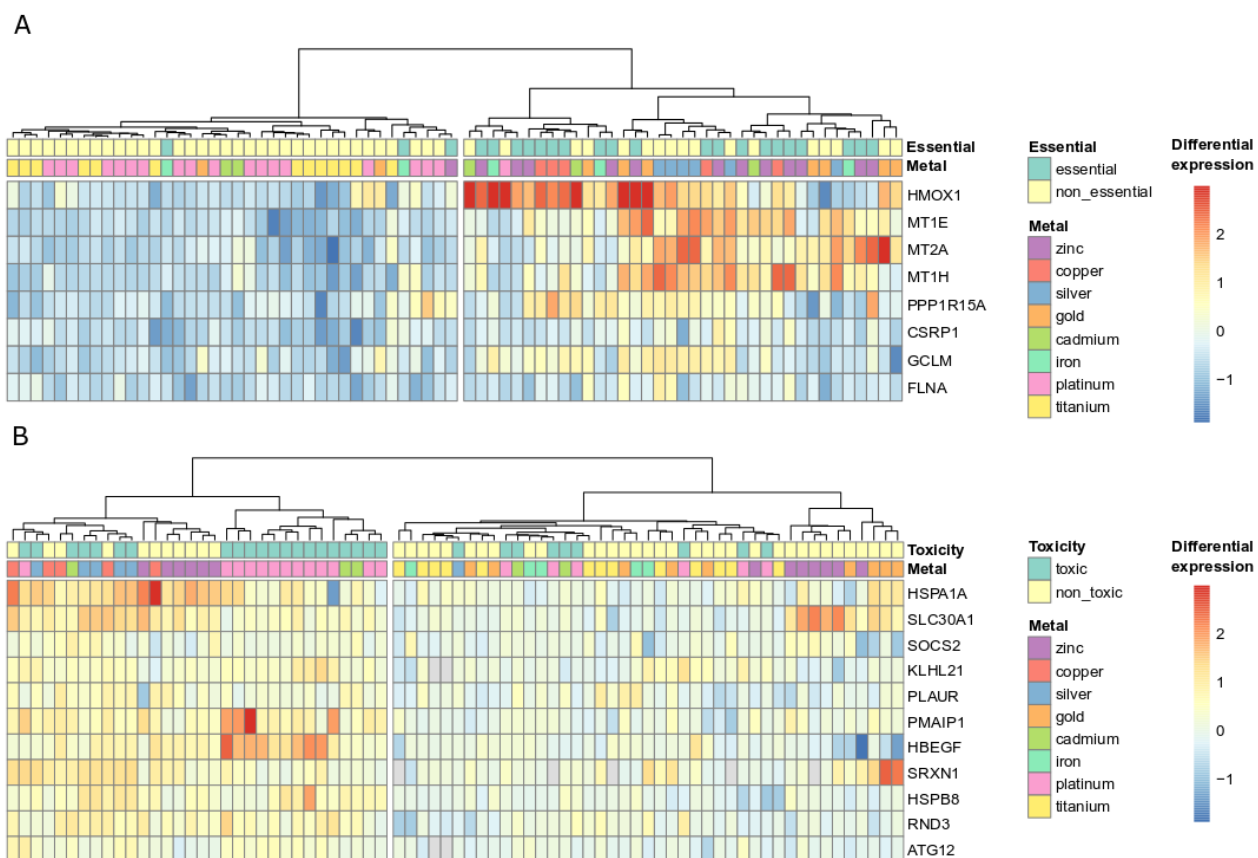

**Fig. S9.** Heatmap of gene expression for the genes related to bioessential (A) or highly-toxic metals-treated cells (B) across data sets and conditions. Bioessential metals are iron, copper and zinc, while highly-toxic metals are silver, cadmium and platinum. Clustering was performed by ascending hierarchical classification using Ward method on squared distances.

| GEO dataset reference | Composition      | Form(s) | Form details                                                                           | Cell type                                                                                                                |
|-----------------------|------------------|---------|----------------------------------------------------------------------------------------|--------------------------------------------------------------------------------------------------------------------------|
| GSE103115             | Platinum         | Ionic   | Cisplatin                                                                              | Breast cancer cells (BT549, HCC38, MDA-MB-157, MDA-MB-231)                                                               |
| GSE109375             | Copper           | Ionic   | Copper sulfate                                                                         | Alveolar epithelium cells (BEAS-2B), colon cancer cells (HCT116)                                                         |
| GSE110410             | Titanium         | NP      | Titanium oxide                                                                         | Epithelial colorectal adenocarcinoma cells (Caco-2)                                                                      |
| GSE110425             | Platinum         | Ionic   | Oxaliplatin                                                                            | Colon cancer cells (HCT116)                                                                                              |
| GSE117056             | Titanium         | NP      | Titanium oxide, D = 22 to 214 nm                                                       | Liver cancer cells (HepG2)                                                                                               |
| GSE127773             | Copper           | NP      | Copper oxide, D < 400 nm, nude or -COOH coating                                        | Epithelium cells                                                                                                         |
| GSE127962             | Silicon          | NP      | Silica, spheres, D = 40 to 200 nm                                                      | Alveolar epithelium cells (BEAS-2B)                                                                                      |
| GSE13525              | Platinum         | Ionic   | Carboplatin                                                                            | Ovarian cancer cells (36M2)                                                                                              |
| GSE136595             | Cadmium          | Ionic   |                                                                                        | Breast cancer cells (MCF7)                                                                                               |
| GSE16247              | Copper, platinum | Ionic   | Thioxotriazole copper (II), cisplatin                                                  | Fibrosarcoma cells (HT1080)                                                                                              |
| GSE16349              | Iron             | Ionic   | Ferrous sulfate                                                                        | Dermal fibroblasts                                                                                                       |
| GSE16425              | Titanium         | NP      | Titanium oxide, D = 7 to 200 nm                                                        | Keratinocyte (HaCat)                                                                                                     |
| GSE17676              | Titanium         | NP      | Titanium oxide, nanotubes, L = 1 $\mu$ m, porous                                       | Endothelial cells, vascular smooth muscle cells                                                                          |
| GSE20320              | Cadmium          | Ionic   | Cadmium chloride                                                                       | Spleen lymphoblasts (TK6)                                                                                                |
| GSE20677              | Gold             | NP      | Sphere, D = 10 nm, functionalized with an oligonucleotide                              | Peripheral blood mononuclear cells                                                                                       |
| GSE2111               | Zinc             | Ionic   | Zinc sulfate                                                                           | Bronchial epithelial cells                                                                                               |
| GSE25167              | Titanium, zinc   | NP      | Titanium oxide, D = 5 nm; zinc oxide, D = 9 nm                                         | Keratinocyte (HaCat), melanoma cells (SK-MEL-28)                                                                         |
| GSE27204              | Cadmium          | Ionic   | Cadmium chloride                                                                       | Kidney cells (HK-2)                                                                                                      |
| GSE2964               | Zinc             | Ionic   | Zinc acetate                                                                           | Lymphoma B cells (Ramos)                                                                                                 |
| GSE30774              | Iron             | Ionic   | Ferric ammonium citrate                                                                | Bone osteosarcoma cells (MG-63)                                                                                          |
| GSE31286              | Cadmium          | Ionic   | Cadmium chloride                                                                       | Liver cancer cells (HepG2)                                                                                               |
| GSE3573               | Iron             | Ionic   | Ferric ammonium citrate                                                                | Epithelial colorectal adenocarcinoma cells (Caco-2)                                                                      |
| GSE38545              | Platinum         | Ionic   | Cisplatin                                                                              | Ovarian cancer cells (NIH:OVCA-3, SK-OV-3, TOV-21G)                                                                      |
| GSE39316              | Titanium, zinc   | NP      | Titanium oxide, spheres, D = 30 nm; zinc oxide, spheres, D = 15 nm                     | T lymphocytes (Jurkat), monocytes derived macrophages (hMDM), monocytes derived dendritic cells (mdDC)                   |
| GSE42069              | Titanium, carbon | NP      | Titanium oxide, nanobelt, L = 7 $\mu$ m, D = 10 nm; nanotubes, L = 7 $\mu$ m, D = 25nm | Monocytes derives macrophages (THP1), epithelial colorectal adenocarcinoma cells (Caco-2), small airway epithelial cells |
| GSE43515              | Carbon           | NP      | Multiwalled carbon nanotubes, carbon black nanoparticles                               | Lung Fibroblast                                                                                                          |
| GSE45322              | Zinc             | NP      | Zinc oxide, D < 100nm, coated and uncoated                                             | Olfactory neurosphere derived cells                                                                                      |
| GSE47980              | Platinum         | Ionic   | Cisplatin                                                                              | Melanoma cells (MM200, SK-MEL-28, igR3, Me4405, Mel-RM), melanocyte                                                      |

|          |            |              |                                                                                                                                       |                                                                                 |
|----------|------------|--------------|---------------------------------------------------------------------------------------------------------------------------------------|---------------------------------------------------------------------------------|
| GSE53700 | Silicon    | NP           | Silica, spheres, D = 9 and 18 nm,                                                                                                     | Adenocarcinomic alveolar epithelial cells (A549)                                |
| GSE54962 | Iron       | Ionic        | Ferric ammonium citrate                                                                                                               | Adenocarcinomic alveolar epithelial cells (A549)                                |
| GSE55349 | Gold       | NP           | Spheres, D = 5 nm, citrate coated                                                                                                     | Epithelial colorectal adenocarcinoma cells (Caco-2)                             |
| GSE56432 | Gold       | NP           | Spheres, D = 20 nm, citrate coated                                                                                                    | Dermal fibroblasts, prostate cancer cells (PC3)                                 |
| GSE60159 | Zinc       | NP           | Zinc oxide, D < 100nm, uncoated                                                                                                       | Primary human hepatic stellate cells                                            |
| GSE60408 | Gold, zinc | Ionic        | Auranofin, zinc pyrithione                                                                                                            | Lymphoma B cells (U2932, OCI-LY3, OCI-LY7)                                      |
| GSE62253 | Silver     | Ionic and NP | Silver nitrate; spheres, D = 15 nm, polymer coated                                                                                    | Epithelial colorectal adenocarcinoma cells (Caco-2)                             |
| GSE6818  | Gold       | NP           | D = 2 to 200 nm                                                                                                                       | Skin fibroblasts                                                                |
| GSE69644 | Platinum   | Ionic        | Cisplatin                                                                                                                             | Kidney cells (HK-2)                                                             |
| GSE7035  | Platinum   | Ionic        | Carboplatin                                                                                                                           | Adenocarcinomic alveolar epithelial cells (A549)                                |
| GSE73302 | Platinum   | Ionic        | Cisplatin                                                                                                                             | Adenocarcinomic alveolar epithelial cells (A549)                                |
| GSE80695 | Iron       | NP           | Iron oxide (maghemite), D = 7 nm, polymer coated                                                                                      | Bone derived mesenchymal stem cells                                             |
| GSE84982 | Silver     | Ionic and NP | Silver nitrate; spheres, D = 20 to 110 nm                                                                                             | Epithelial colorectal adenocarcinoma cells (Caco-2), breast cancer cells (MCF7) |
| GSE92901 | Carbon     | NP           | Multiwalled carbon nanotubes, L = 1 to 30 $\mu$ m, D = 10 to 50 nm; graphite fiber, L = 10 $\mu$ m, D = 140 nm; fullerene, D = 100 nm | Monocytes derives macrophages (THP1)                                            |
| GSE92987 | Gold       | NP           | Spheres, D = 14 nm                                                                                                                    | Retinoblastoma cells (Y79)                                                      |
| GSE9539  | Copper     | Ionic        | Copper sulfate                                                                                                                        | Liver cancer cells (HepG2)                                                      |
| GSE9951  | Cadmium    | Ionic        | Cadmium chloride                                                                                                                      | Prostate epithelial cells                                                       |

**Table S1.** GEO references and experimental details of the datasets that have been analyzed to determine the cellular response to metallic nanoparticles and metal ions for eight metals (Ag, Au, Cd, Cu, Fe, Pt, Ti, Zn) and non-metallic nanoparticles (C, Si).

| Rank | PC1        | PC2      | PC3       |
|------|------------|----------|-----------|
| 1    | GADD45B    | DUSP5    | HSD17B7   |
| 2    | NXF1       | SPRED2   | SHCBP1    |
| 3    | SERTAD1    | TXNRD1   | TSC22D3   |
| 4    | HIST2H2AA3 | MT1A     | RAD51AP1  |
| 5    | TUFT1      | DNAJB1   | TTBK2     |
| 6    | GADD45A    | ABTB2    | HERPUD1   |
| 7    | JUN        | SRGAP1   | ZNF12     |
| 8    | ATF3       | SPSB1    | ZNF148    |
| 9    | TOB1       | PPP1R15A | NEIL3     |
| 10   | HBEGF      | KLF6     | ACAT2     |
| 11   | MAP1LC3B   | MT1E     | SERPINI1  |
| 12   | TUBB2A     | IGF2BP2  | CHAC1     |
| 13   | DUSP1      | SPRY4    | GABARAPL1 |
| 14   | IER5       | MT1G     | PCYOX1    |
| 15   | CDKN1A     | TRIB3    | SGK3      |
| 16   | ZNF408     | LDLR     | INHBE     |
| 17   | OSGIN1     | JARID2   | IFRD1     |
| 18   | TNFSF9     | NEDD4L   | SLC46A3   |
| 19   | FOSB       | MCL1     | MTHFD2    |
| 20   | GPR3       | SERPINE2 | PIR       |
| 21   | PMAIP1     | SLC7A11  | CLK1      |
| 22   | PHLDA2     | MT1B     | LYZ       |
| 23   | IER2       | MT2A     | KIF18A    |
| 24   | PDRG1      | MAFF     | DNAJB4    |
| 25   | CLCF1      | LPP      | ZNF652    |

**Table S2.** Table of the 25 top genes that contributes the most to the first three principal components of the principal component analysis.

|                | Gold (NP) | Zinc (ion) | Cadmium (ion) | Copper (NP) | Copper (ion) | Silver (NP) | Silver (ion) | Gold (ion) | Zinc (NP) | Iron (NP) | Carbon (NP) | Iron (ion) | Silicon (NP) | Platinum (ion) | Titanium (NP) |
|----------------|-----------|------------|---------------|-------------|--------------|-------------|--------------|------------|-----------|-----------|-------------|------------|--------------|----------------|---------------|
| Gold (NP)      | < 0.001   | < 0.001    | < 0.001       | < 0.001     | 0.0033       | < 0.001     | < 0.001      | < 0.001    | < 0.001   | 0.3400    | 0.0733      | 0.0767     | 0.9733       | 0.0133         | 0.0033        |
| Zinc (ion)     |           | < 0.001    | < 0.001       | < 0.001     | < 0.001      | < 0.001     | < 0.001      | < 0.001    | < 0.001   | 0.3467    | 0.1933      | 0.1867     | 0.7933       | 0.1000         | 0.0800        |
| Cadmium (ion)  |           |            | < 0.001       | < 0.001     | < 0.001      | < 0.001     | < 0.001      | < 0.001    | < 0.001   | 0.5700    | 1.0000      | 0.0100     | < 0.001      | 0.0133         | 0.7433        |
| Copper (NP)    |           |            |               | < 0.001     | < 0.001      | < 0.001     | < 0.001      | < 0.001    | < 0.001   | 0.1700    | 0.9733      | < 0.001    | < 0.001      | < 0.001        | 0.1467        |
| Copper (ion)   |           |            |               |             | < 0.001      | < 0.001     | < 0.001      | < 0.001    | < 0.001   | 0.4367    | 0.3433      | 0.0033     | < 0.001      | < 0.001        | 0.1400        |
| Silver (NP)    |           |            |               |             |              | < 0.001     | < 0.001      | < 0.001    | < 0.001   | 0.5700    | 0.2267      | < 0.001    | 0.0067       | < 0.001        | 0.0767        |
| Silver (ion)   |           |            |               |             |              |             | < 0.001      | < 0.001    | < 0.001   | 0.4833    | 0.1867      | < 0.001    | 0.0200       | < 0.001        | 0.0633        |
| Gold (ion)     |           |            |               |             |              |             |              | < 0.001    | < 0.001   | 0.4367    | 0.9433      | 0.0100     | 0.1233       | 0.0033         | 0.0400        |
| Zinc (NP)      |           |            |               |             |              |             |              |            | < 0.001   | 0.0833    | 0.2300      | 0.0033     | 0.0067       | < 0.001        | 0.0033        |
| Iron (NP)      |           |            |               |             |              |             |              |            | < 0.001   | < 0.001   | 0.4167      | < 0.001    | 0.0133       | 1.0000         | 0.4233        |
| Carbon (NP)    |           |            |               |             |              |             |              |            |           |           | < 0.001     | 0.8000     | 0.0367       | 0.0133         | < 0.001       |
| Iron (ion)     |           |            |               |             |              |             |              |            |           |           |             | < 0.001    | < 0.001      | 0.0233         | 0.1267        |
| Silicon (NP)   |           |            |               |             |              |             |              |            |           |           |             |            | < 0.001      | 0.0133         | 0.0167        |
| Platinum (ion) |           |            |               |             |              |             |              |            |           |           |             |            |              | < 0.001        | 0.3300        |
| Titanium (NP)  |           |            |               |             |              |             |              |            |           |           |             |            |              |                | < 0.001       |

**Table S3.** Table of the p-values calculated from randomization method to estimate the significance of the calculated correlation coefficients displayed in Figure 2

**Data file S1.** General table of gene expression in log<sub>2</sub>fold change for the 85 studied conditions and the 14912 selected genes.

**Data file S2.** Table of the 50 genes with the lowest average rank for each studied nanoparticulate or ionic form.

**Data file S3 to S14.** Tables of the enriched biological functions for each studied nanoparticulate or ionic form, with the associated FDR adjusted p-value and the gene driving the enrichment.
